# Supplementary material for: A Study of the Effects of Tornado Translation on Wind Loading Using a Potential Flow Model
Source: Frontiers journal article supplement (doi:10.3389/fbuil.2022.840812), 2022-03-16
Supplement: Data_Sheet_1.docx [file Data_Sheet_1.docx]

**Appendix A**

The unsteady Bernoulli equation can be expressed as:

|  | [A1] |
| --- | --- |

where is the resultant velocity combining the and components. is the velocity far away, assumed to be 0, is the pressure, is the reference pressure and is the time derivative of the potential function, expressed as:

|  | [A2] |
| --- | --- |

Rearranging equation [A1] and diving through by (the square of the reference velocity, which is the maximum circumferential velocity of the vortex) gives:

|  | [A3] |
| --- | --- |

Rearranging to form pressure coefficient where:

|  | [A4] |
| --- | --- |

Therefore,

|  | [A5] |
| --- | --- |

where , Thus,

|  | [A6] |
| --- | --- |
|  | [A7] |

The maximum circumferential velocity of the vortex is given as:

|  | [A8] |
| --- | --- |

By substituting equation [A1], [A8] into [A5], we obtain the expression that illustrates the effect of translation speed on the pressure coefficient at a point:

|  | [A9] |
| --- | --- |

It should be noted that if the translating velocity is zero ( =0), then equation [6] (or [A9]) at the radial distance of will reduce to:

|  | [A10] |
| --- | --- |

Thus, the static pressure can be expressed as:

|  | [A11] |
| --- | --- |

According to the Rankine vortex model for tangential velocity, the static pressure profile can be expressed such that:

|  | [A12] |
| --- | --- |

For , equation [A9] will reduce to:

|  | [A13] |
| --- | --- |

Therefore, equation [6] (or [A9]) at the radial distance of will give the same static pressure as the Rankine model. It should be noted that since this study uses potential vortices, which by definition do not have finite velocity and pressure in the core, the match with the Rankine model only holds for ).

**Appendix B**

The panel method is used to compute the flow around the airfoil and obtain the lift force. The panel method is outlined fully in Hess and Smith (1967) and Rubbert (1964). The normal velocity () at the ith panel is equal to zero.

|  | [B1] |
| --- | --- |

The tangential velocity () at the panel can be expressed as:

|  | [B2] |
| --- | --- |

The normal flow condition () is used to solve for panel source strength and the tangential flow condition () is used to solve for the panel flow velocities and thus the pressure distribution. Kutta condition is enforced at the trailing edge in order to ensure that the flow leaves the trailing edge smoothly. According to Anderson (2016), the Kutta condition can be imposed by equating the panels strengths of the two panels making up the trailing edge so that they cancel out. Therefore, the vortex strengths at the and the panels are set with the following condition:

|  | [B3] |
| --- | --- |

By ensuring that the vorticity at the trailing edge is zero, the rear stagnation point will be situated at the trailing edge where the flow will leave with a direction along the bisector of the trailing edge angle with velocities equal in magnitude and direction. The total surface velocity at each panel is the sum of the contribution of the vortex flow and the source and vortex panels:

|  | [B4] |
| --- | --- |

where is the velocity magnitude of the flow field at the corresponding panel location (). The surface pressure distribution is obtained using the Bernoulli equation [A2] from which [A4] can be used:

|  | [A4] |
| --- | --- |

With the surface pressure distribution obtained, the normal force can be calculated with the relation:

|  | [B5] |
| --- | --- |

where is the angle between the inflow angle to panels. The steady lift coefficient, on the airfoil is calculated using on the sum of all normal forces as:

|  | [B6] |
| --- | --- |

where the overall lift coefficient is:

|  | [B7] |
| --- | --- |

The panel method code developed in the current analysis validated against the XFOIL software (Drela, 1989). XFOIL utilises high-order panel method for the prediction of surface pressure and lift that can also be further coupled with a viscous interaction method for the evaluation of drag and boundary layer transition and separation. The current simulation (hereby named VPM) is conducted using a symmetrical airfoil (*naca0012*) with chord length of =1, airfoil thickness of =0.12 placed in a uniform flow with the freestream velocity of 1 m/s for various angles of attack (= 0o, 5o, 10o and 20o), i.e., the angle between the relative inflow angle and the line of the chord of the airfoil. Figure B1 shows the comparison of surface pressure distribution on the airfoil corresponding to the angle of attack of 10o and 20o obtained from VPM and XFOIL. The profile in blue denotes the surface pressure distribution on the top of the airfoil while profiles in red denotes the pressure distribution on the bottom of the airfoil. It can be observed that the VPM predicts the pressure distribution relatively well and closely resembles the profile predicted by XFOIL for both angles of attack ().


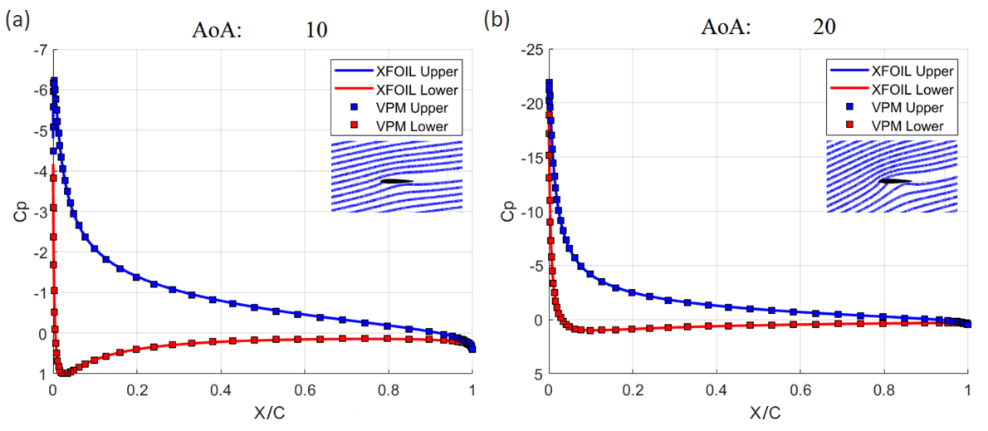


Figure B1: Comparison of surface pressure distribution in the angle of attack of 10 degrees (a) and 20 degrees (b) from VPM and XFOIL.
